# Supplementary material for: Tuning the properties of boron-doped reduced graphene oxide by altering the boron content
Source: Royal Society of Chemistry journal article supplement (doi:10.1039/d0nj03909h), 2020-01-01
Supplement: d0nj03909h1.pdf [file d0nj03909h1.pdf]

## Tuning the properties of boron-doped reduced graphene oxide by altering the boron content

Nonjabulo P. D. Ngidi, Moses A. Ollengo and Vincent O. Nyamori\*

School of Chemistry and Physics, University of KwaZulu-Natal, Westville Campus, Private Bag  
X54001, Durban 4000, South Africa

\*Corresponding author: Tel. +27-31-2608256, Fax: +27-31-2603091, Email:

[nyamori@ukzn.ac.za](mailto:nyamori@ukzn.ac.za)

Email addresses of co-authors: [nonjabulongidi@gmail.com](mailto:nonjabulongidi@gmail.com), [mosesollengo@gmail.com](mailto:mosesollengo@gmail.com)

### Supplementary data

#### SEM and EDS analysis

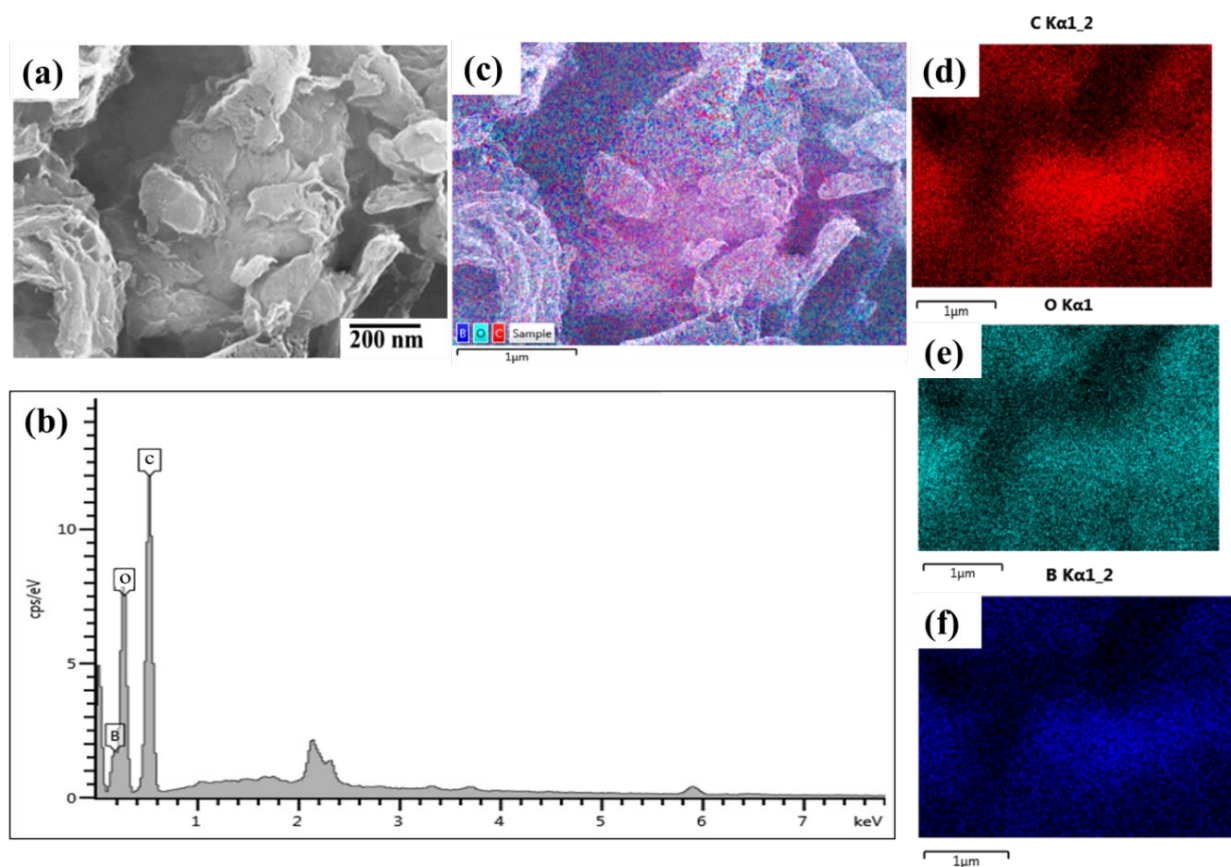

## BET analysis

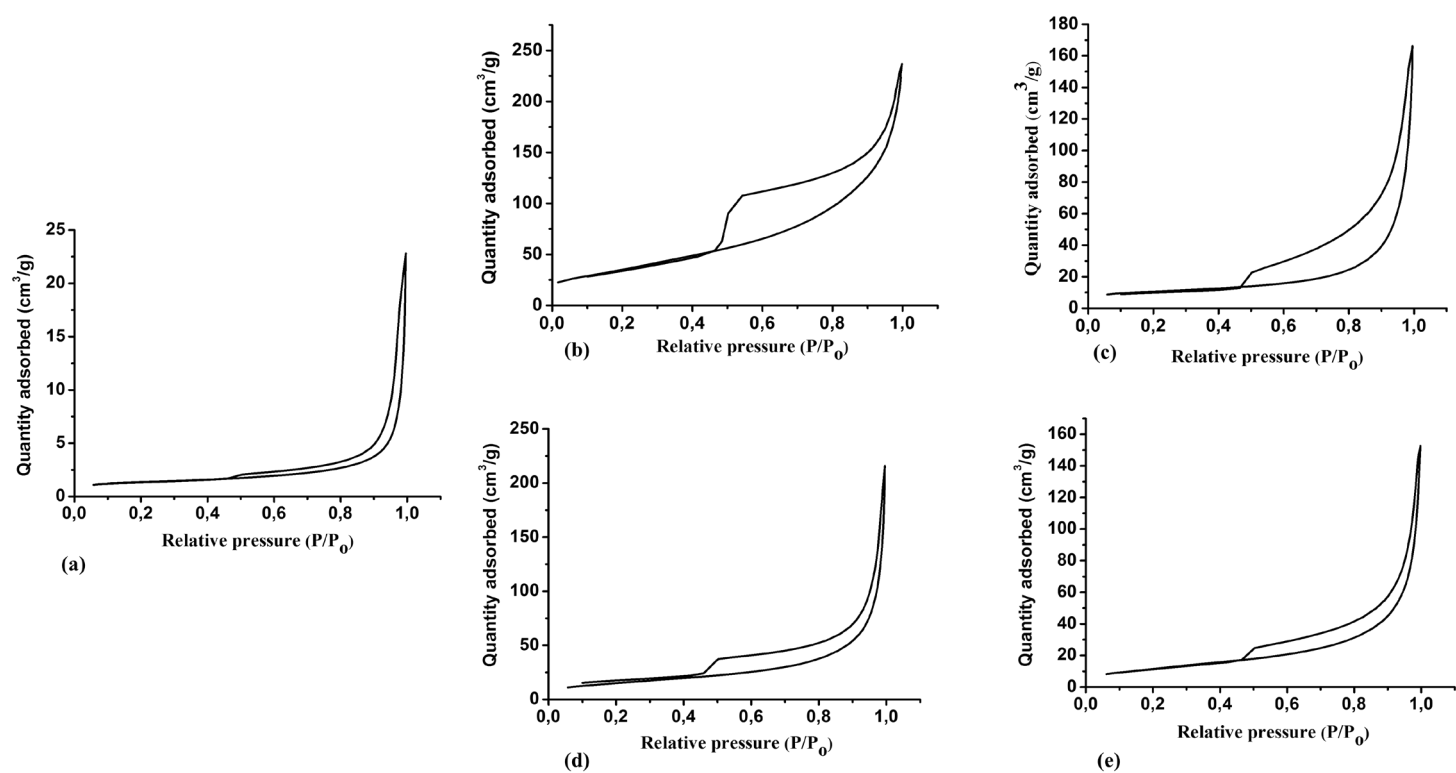

**Figure S2:** N<sub>2</sub> adsorption-desorption isotherms for (a) GO, (b) B-rGO-70, (c) B-rGO-60, (d) B-rGO-50 and (e) B-rGO-40

## UV-Vis analysis

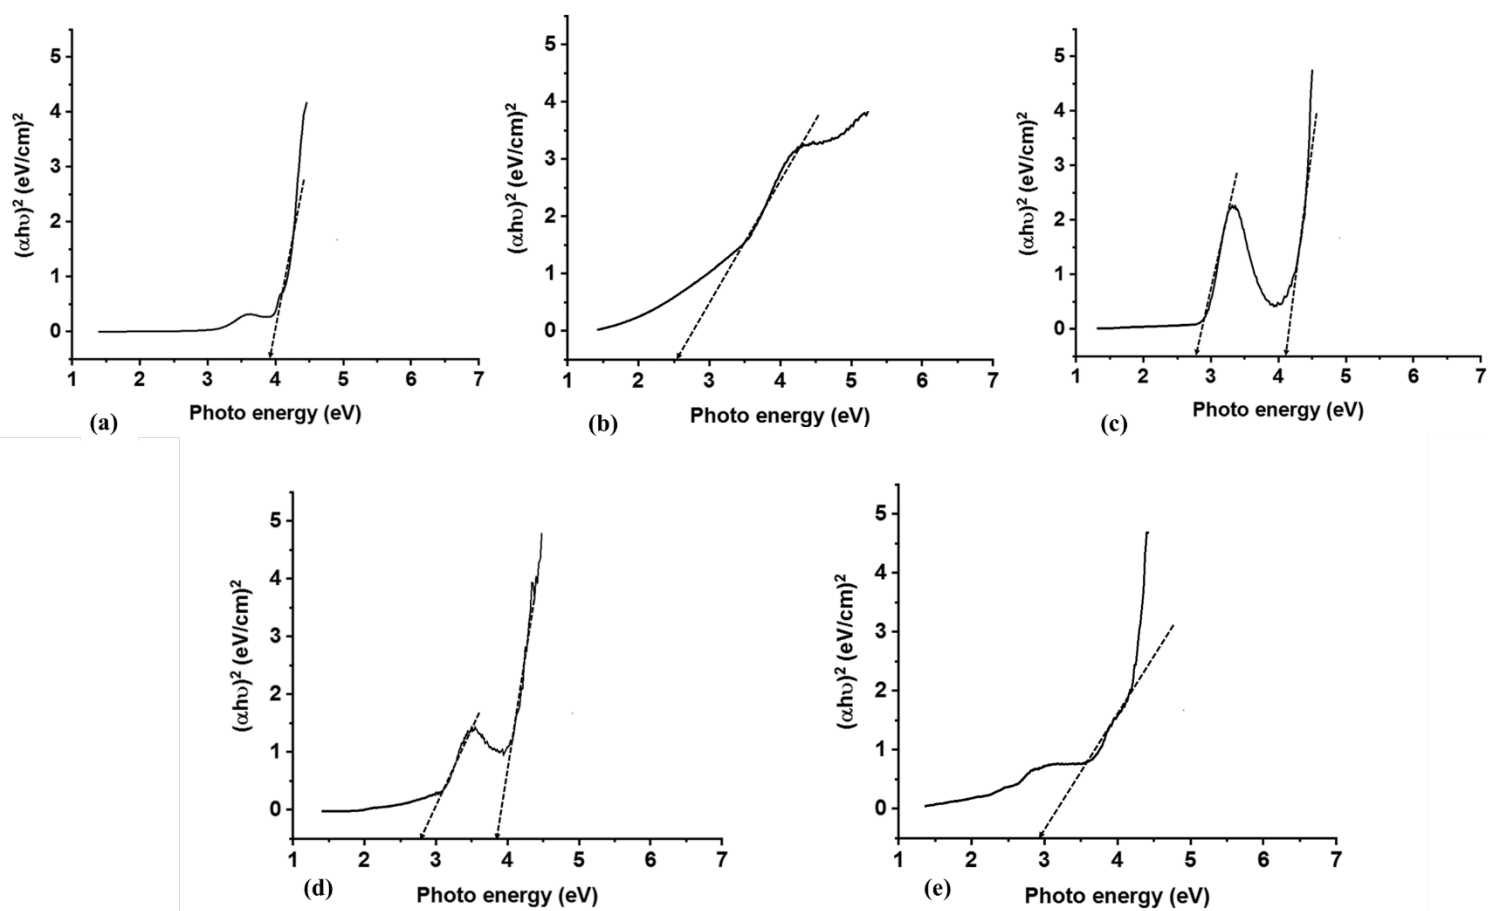

**Figure S3:** Figure S3: Tauc's plot for (a) GO, (b) B-rGO-70, (c) B-rGO-60, (d) B-rGO-50, and (e) B-rGO-40
